# Supplementary material
Source: PubMed Central journal article supplement (PMC8677534)
Supplement: awab248_supplementary_data.pdf [file awab248_supplementary_data.pdf]

## **Supplementary material**

### **Longitudinal [<sup>18</sup>F]MK-6240 tau tangles accumulation follows Braak stages**

Tharick A. Pascoal MD, PhD<sup>1,2,3</sup>, Andrea L. Benedet PhD<sup>1</sup>, Dana L. Tudorascu PhD<sup>3</sup>, Joseph Therriault BSc<sup>1</sup>, Sulantha Mathotaarachchi MSc<sup>1</sup>, Melissa Savard MSc<sup>1</sup>, Firoza Z. Lussier BSc<sup>1</sup>, Cécile Tissot BSc<sup>1</sup>, Mira Chamoun PhD<sup>1</sup>, Min Su Kang BSc<sup>1,2</sup>, Jenna Stevenson MSc<sup>1</sup>, Gassan Massarweh PhD<sup>2</sup>, Marie-Christine Guiot MD<sup>2</sup>, Jean-Paul Soucy MD, MSc<sup>2</sup>, Serge Gauthier MD, FRCPC<sup>1</sup>, and Pedro Rosa-Neto MD, PhD<sup>1,2</sup>.

1 Translational Neuroimaging Laboratory, The McGill University Research Centre for Studies in Aging, Department of Neurology and Neurosurgery, Faculty of Medicine, McGill University, Montreal, QC, Canada.

2 Montreal Neurological Institute, McGill University, Montreal, QC, Canada.

3 Department of Psychiatry, University of Pittsburgh, Pittsburgh, Pennsylvania, USA.

**Supplementary Fig. 1. Representative segmentation of transentorhinal and entorhinal cortices.**

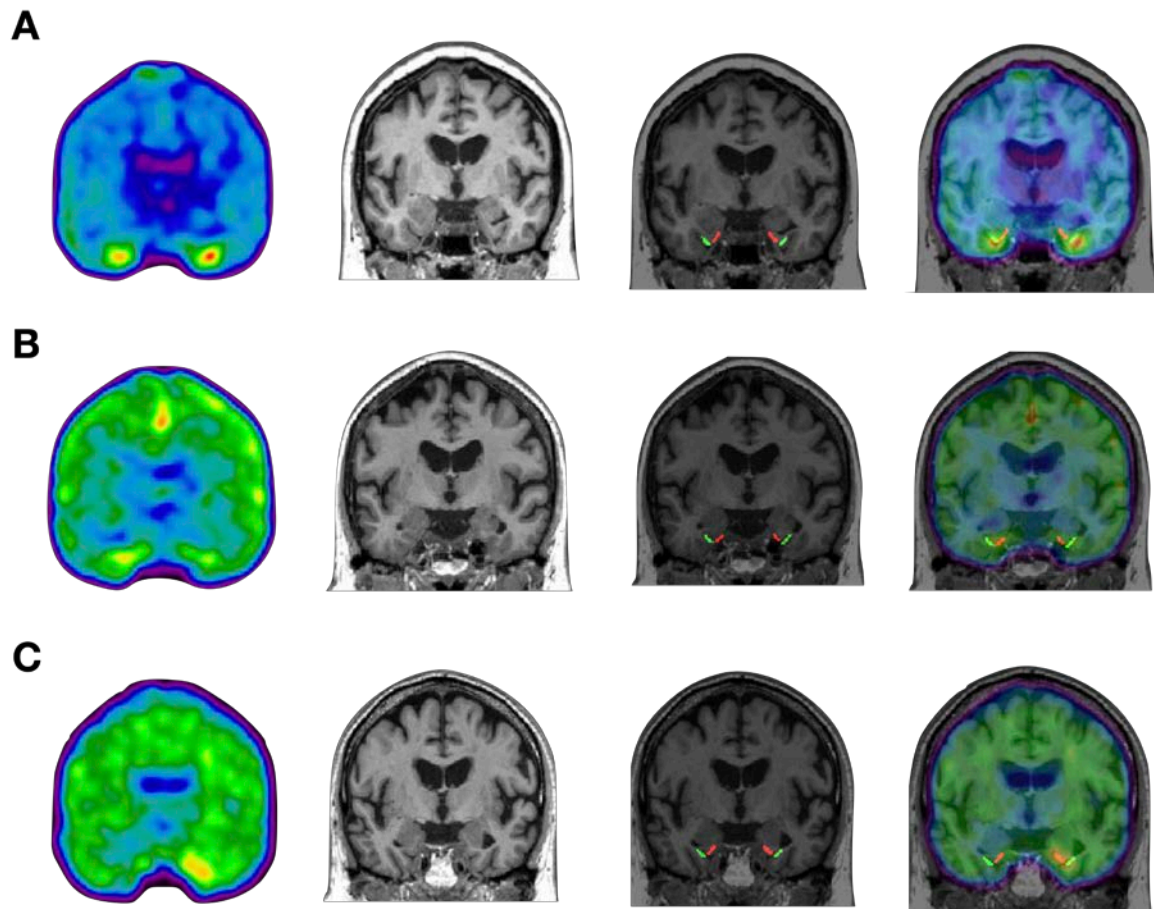

Each row show images obtained from a different study participant. (A) CU individuals, 74 years old, female, MMSE=28, CDR = 0, and A $\beta$  PET positive. (B) CU individuals, 73 years old, female, MMSE = 30, CDR = 0, and A $\beta$  PET negative. (C) MCI, 73 years old, male, MMSE = 27, CDR=0.5, and A $\beta$  PET positive. The column on the left side represents [ $^{18}\text{F}$ ]MK-6240 PET scans, the second column from left to right shows non-linearly transformed MRI to the reference MNI space, the third column from left to right shows MRI with transentorhinal (green) and entorhinal (red) ROI overlaid, and the column in the left side shows all three aforementioned images overlaid. In these three individuals, [ $^{18}\text{F}$ ]MK-6240 SUVR was above threshold for tau abnormality in the transentorhinal but not in the entorhinal cortex. The 2 mm Jacobian (deformation) field used in our image transformations mitigated the well known rhinal sulcus anatomical variability. In our final image, our algorithms (followed by visual QC) assured that all individuals present a

transentorhinal cortex with a similar shape and size, conforming to the reference MNI space template.

**Supplementary Fig. 2. PET Braak-like regions used in the analysis.**

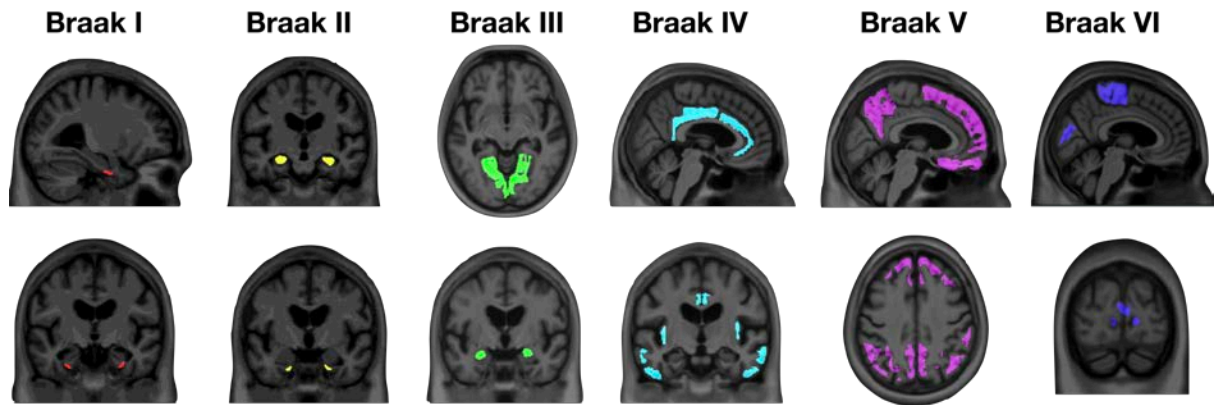

The figure shows Braak-like stages ROIs overlaid on a structural MRI template. PET Braak-like regions segmentation was previously described elsewhere (Pascoal *et al.*, 2020) and were based on postmortem observations (Braak and Braak, 1991, 1997), as follows: Braak I (transentorhinal), Braak II (entorhinal and hippocampus), Braak III (amygdala, parahippocampal gyrus, fusiform gyrus, lingual gyrus), Braak IV (insula, inferior temporal, lateral temporal, posterior cingulate, and inferior parietal), Braak V (orbitofrontal, superior temporal, inferior frontal, cuneus, anterior cingulate, supramarginal gyrus, lateral occipital, precuneus, superior parietal, superior frontal, rostromedial frontal), and Braak VI (paracentral, postcentral, precentral, and pericalcarine). The brain regions were based on the Desikan-Killiany-Tourville atlas (Klein and Tourville, 2012), only voxels with a probability higher than 90% to be located in the cerebral cortex were included in our ROI. We also removed from these Braak masks, using probabilistic uptake maps across the cognitively unimpaired population, edge voxels with a high probability (90%) of suffering spillover from meningeal off-target bindings.

### Supplementary Fig. 3. Estimates from the repeated measures analysis.

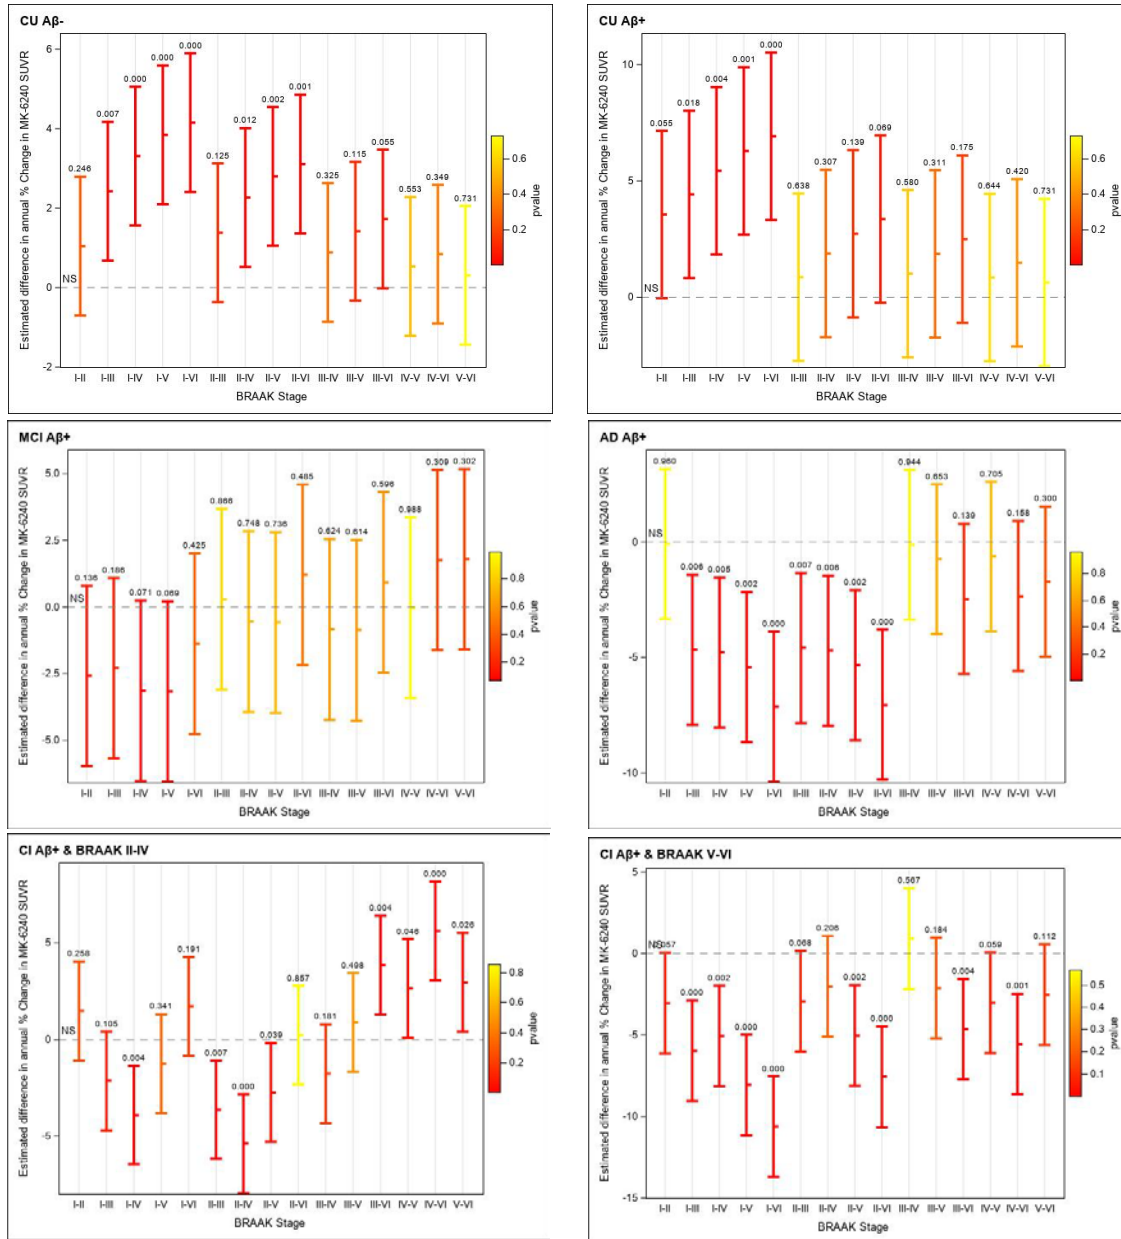

The figure shows in the y-axes the estimated differences in the annual percentage of change in [<sup>18</sup>F]MK-6240 SUVR, and each bar represents the 95% CI for that specific difference. At the top of each bar line, we show the p value obtained by testing whether the difference between Braak regions differs significantly from 0. Also, the bars are colored such that darker shades show lower p values, and shades towards orange and yellow represent higher p values. A horizontal line (y = 0) is presented as a dotted line and shows which 95% CI includes (or cross) the 0 value; thus, those differences are not statistically

significant. The x-axes show the differences between which Braak regions are being presented in the bars, starting with Braak stage I versus Braak stage II and so on.

**Supplementary Table 1.** Longitudinal progression in the transentorhinal cortex after correction for partial volume effects

| CU A $\beta$ -                          |                 |         | CU A $\beta$ +          |                 |     | MCI A $\beta$ +         |                  |          | AD dementia A $\beta$ + |                  |     |
|-----------------------------------------|-----------------|---------|-------------------------|-----------------|-----|-------------------------|------------------|----------|-------------------------|------------------|-----|
| $\Delta$ SUVR mean (SD)                 | 95% CI          | CV      | $\Delta$ SUVR mean (SD) | 95% CI          | CV  | $\Delta$ SUVR mean (SD) | 95% CI           | CV       | $\Delta$ SUVR mean (SD) | 95% CI           | CV  |
| <b>Braak I (Transentorhinal cortex)</b> |                 |         |                         |                 |     |                         |                  |          |                         |                  |     |
| 0.0296<br>(0.106)                       | 0.003,<br>0.056 | 3.<br>5 | 0.078<br>(0.111)        | 0.028,<br>0.128 | 1.4 | 0.015<br>(0.206)        | -0.081,<br>0.111 | 13<br>.7 | 0.076<br>(0.255)        | -0.060,<br>0.211 | 3.3 |

Partial volume correction of [ $^{18}$ F]MK-6240 SUVR values in the newly segmented transentorhinal cortex (Braak I) using region-based voxel-wise method <sup>41</sup>. Subsequent studies are underway to address the effects of partial volume correction in other Braak regions most affected by meningeal spillover.

**Supplementary Table 2. CU A $\beta$  negative (df = 382)**

| Comparison | Estimate | <i>P</i> value | 95% CI |       | 99% CI |       |
|------------|----------|----------------|--------|-------|--------|-------|
| I - II     | 1.044    | 0.504          | -2.022 | 4.109 | -2.993 | 5.080 |
| I - III    | 2.425    | 0.121          | -0.641 | 5.491 | -1.612 | 6.461 |
| I - IV     | 3.310    | 0.034          | 0.244  | 6.376 | -0.726 | 7.347 |
| I - V      | 3.843    | 0.014          | 0.778  | 6.909 | -0.193 | 7.880 |
| I - VI     | 4.152    | 0.008          | 1.086  | 7.218 | 0.116  | 8.188 |
| II - III   | 1.381    | 0.376          | -1.684 | 4.447 | -2.655 | 5.418 |
| II - IV    | 2.266    | 0.147          | -0.799 | 5.332 | -1.770 | 6.303 |
| II - V     | 2.800    | 0.073          | -0.266 | 5.865 | -1.237 | 6.836 |
| II - VI    | 3.108    | 0.047          | 0.043  | 6.174 | -0.928 | 7.145 |
| III - IV   | 0.885    | 0.571          | -2.181 | 3.951 | -3.151 | 4.922 |
| III - V    | 1.418    | 0.364          | -1.647 | 4.484 | -2.618 | 5.455 |
| III - VI   | 1.727    | 0.269          | -1.339 | 4.793 | -2.309 | 5.764 |
| IV - V     | 0.533    | 0.733          | -2.533 | 3.599 | -3.503 | 4.570 |
| IV - VI    | 0.842    | 0.590          | -2.224 | 3.908 | -3.195 | 4.878 |
| V - VI     | 0.309    | 0.843          | -2.757 | 3.374 | -3.728 | 4.345 |

The table shows estimates from the repeated measure analysis corrected for sex and age.

**Supplementary Table 3. CU A $\beta$  positive (df = 124).**

| Comparison | Estimate | p-value | 95% CI |        | 99% CI |        |
|------------|----------|---------|--------|--------|--------|--------|
| I - II     | 3.557    | 0.128   | -1.036 | 8.151  | -2.514 | 9.628  |
| I - III    | 4.421    | 0.059   | -0.172 | 9.014  | -1.650 | 10.492 |
| I - IV     | 5.437    | 0.021   | 0.844  | 10.030 | -0.634 | 11.508 |
| I - V      | 6.287    | 0.008   | 1.694  | 10.880 | 0.216  | 12.358 |
| I - VI     | 6.919    | 0.003   | 2.326  | 11.513 | 0.848  | 12.990 |
| II - III   | 0.864    | 0.710   | -3.730 | 5.457  | -5.207 | 6.934  |
| II - IV    | 1.880    | 0.419   | -2.713 | 6.473  | -4.191 | 7.951  |
| II - V     | 2.730    | 0.242   | -1.864 | 7.323  | -3.341 | 8.801  |
| II - VI    | 3.362    | 0.150   | -1.231 | 7.955  | -2.709 | 9.433  |
| III - IV   | 1.016    | 0.662   | -3.577 | 5.609  | -5.055 | 7.087  |
| III - V    | 1.866    | 0.423   | -2.727 | 6.459  | -4.205 | 7.937  |
| III - VI   | 2.498    | 0.284   | -2.095 | 7.092  | -3.573 | 8.569  |
| IV - V     | 0.850    | 0.715   | -3.743 | 5.443  | -5.221 | 6.921  |
| IV - VI    | 1.482    | 0.524   | -3.111 | 6.075  | -4.589 | 7.553  |
| V - VI     | 0.632    | 0.786   | -3.961 | 5.225  | -5.439 | 6.703  |

The table shows estimates from the repeated measure analysis corrected for sex and age.

**Supplementary Table 4. MCI A $\beta$  positive (df = 118)**

| Comparison | Estimate | p-value | 95% CI |       | 99% CI  |       |
|------------|----------|---------|--------|-------|---------|-------|
| I - II     | -2.586   | 0.342   | -7.955 | 2.783 | -9.685  | 4.512 |
| I - III    | -2.296   | 0.399   | -7.665 | 3.073 | -9.394  | 4.803 |
| I - IV     | -3.142   | 0.249   | -8.511 | 2.227 | -10.240 | 3.956 |
| I - V      | -3.168   | 0.245   | -8.537 | 2.201 | -10.267 | 3.930 |
| I - VI     | -1.380   | 0.612   | -6.749 | 3.990 | -8.478  | 5.719 |
| II - III   | 0.290    | 0.915   | -5.079 | 5.659 | -6.808  | 7.389 |
| II - IV    | -0.556   | 0.838   | -5.925 | 4.813 | -7.654  | 6.542 |
| II - V     | -0.582   | 0.830   | -5.951 | 4.787 | -7.681  | 6.516 |
| II - VI    | 1.207    | 0.657   | -4.162 | 6.576 | -5.892  | 8.305 |
| III - IV   | -0.846   | 0.755   | -6.215 | 4.523 | -7.945  | 6.252 |
| III - V    | -0.873   | 0.748   | -6.242 | 4.496 | -7.971  | 6.226 |
| III - VI   | 0.916    | 0.736   | -4.453 | 6.285 | -6.182  | 8.015 |
| IV - V     | -0.026   | 0.992   | -5.395 | 5.343 | -7.125  | 7.072 |
| IV - VI    | 1.763    | 0.517   | -3.606 | 7.132 | -5.336  | 8.861 |
| V - VI     | 1.789    | 0.511   | -3.580 | 7.158 | -5.310  | 8.887 |

The table shows estimates from the repeated measure analysis corrected for sex and age.

**Supplementary Table 5. AD A $\beta$  positive (df = 94)**

| Comparison | Estimate | p-value | 95% CI  |       | 99% CI  |        |
|------------|----------|---------|---------|-------|---------|--------|
| I - II     | -0.084   | 0.984   | -8.344  | 8.177 | -11.021 | 10.854 |
| I - III    | -4.669   | 0.265   | -12.929 | 3.591 | -15.606 | 6.269  |
| I - IV     | -4.786   | 0.253   | -13.046 | 3.474 | -15.724 | 6.152  |
| I - V      | -5.413   | 0.196   | -13.673 | 2.847 | -16.351 | 5.524  |
| I - VI     | -7.133   | 0.090   | -15.393 | 1.127 | -18.070 | 3.805  |
| II - III   | -4.585   | 0.273   | -12.845 | 3.675 | -15.523 | 6.353  |
| II - IV    | -4.702   | 0.261   | -12.962 | 3.558 | -15.640 | 6.235  |
| II - V     | -5.330   | 0.203   | -13.590 | 2.930 | -16.267 | 5.608  |
| II - VI    | -7.049   | 0.093   | -15.309 | 1.211 | -17.987 | 3.889  |
| III - IV   | -0.117   | 0.978   | -8.377  | 8.143 | -11.055 | 10.821 |
| III - V    | -0.745   | 0.858   | -9.005  | 7.516 | -11.682 | 10.193 |
| III - VI   | -2.464   | 0.555   | -10.724 | 5.796 | -13.402 | 8.474  |
| IV - V     | -0.627   | 0.880   | -8.887  | 7.633 | -11.565 | 10.310 |
| IV - VI    | -2.347   | 0.574   | -10.607 | 5.913 | -13.285 | 8.591  |
| V - VI     | -1.720   | 0.680   | -9.980  | 6.541 | -12.657 | 9.218  |

The table shows estimates from the repeated measure analysis corrected for sex and age.

**Supplementary Table 6. CI A $\beta$  positive Braak II-IV (df = 88)**

| Comparison | Estimate | p-value | 95% CI  |        | 99% CI  |        |
|------------|----------|---------|---------|--------|---------|--------|
| I - II     | 1.486    | 0.538   | -3.290  | 6.263  | -4.841  | 7.814  |
| I - III    | -2.139   | 0.376   | -6.915  | 2.637  | -8.467  | 4.189  |
| I - IV     | -3.903   | 0.108   | -8.679  | 0.873  | -10.230 | 2.425  |
| I - V      | -1.250   | 0.604   | -6.026  | 3.526  | -7.577  | 5.078  |
| I - VI     | 1.722    | 0.476   | -3.055  | 6.498  | -4.606  | 8.049  |
| II - III   | -3.625   | 0.135   | -8.402  | 1.151  | -9.953  | 2.702  |
| II - IV    | -5.389   | 0.027   | -10.165 | -0.613 | -11.717 | 0.939  |
| II - V     | -2.736   | 0.258   | -7.512  | 2.040  | -9.064  | 3.592  |
| II - VI    | 0.235    | 0.922   | -4.541  | 5.011  | -6.092  | 6.563  |
| III - IV   | -1.764   | 0.465   | -6.540  | 3.012  | -8.091  | 4.564  |
| III - V    | 0.889    | 0.712   | -3.887  | 5.665  | -5.438  | 7.217  |
| III - VI   | 3.861    | 0.112   | -0.915  | 8.637  | -2.467  | 10.188 |
| IV - V     | 2.653    | 0.273   | -2.123  | 7.429  | -3.675  | 8.981  |



|         |       |       |        |        |        |        |
|---------|-------|-------|--------|--------|--------|--------|
| IV - VI | 5.624 | 0.022 | 0.848  | 10.400 | -0.703 | 11.952 |
| V - VI  | 2.971 | 0.220 | -1.805 | 7.748  | -3.356 | 9.299  |

The table shows estimates from the repeated measure analysis corrected for sex and age.

**Supplementary Table 7. CI A $\beta$  positive Braak V-VI (df = 100).**

| Comparison | Estimate | p-value | 95% CI  |        | 99% CI  |        |
|------------|----------|---------|---------|--------|---------|--------|
| I - II     | -3.043   | 0.494   | -11.835 | 5.750  | -14.680 | 8.594  |
| I - III    | -5.962   | 0.182   | -14.755 | 2.830  | -17.599 | 5.675  |
| I - IV     | -5.054   | 0.257   | -13.846 | 3.738  | -16.691 | 6.583  |
| I - V      | -8.078   | 0.071   | -16.870 | 0.715  | -19.715 | 3.559  |
| I - VI     | -10.613  | 0.018   | -19.405 | -1.820 | -22.250 | 1.024  |
| II - III   | -2.920   | 0.512   | -11.712 | 5.872  | -14.557 | 8.717  |
| II - IV    | -2.011   | 0.651   | -10.803 | 6.781  | -13.648 | 9.626  |
| II - V     | -5.035   | 0.259   | -13.827 | 3.757  | -16.672 | 6.602  |
| II - VI    | -7.570   | 0.091   | -16.362 | 1.222  | -19.207 | 4.067  |
| III - IV   | 0.909    | 0.838   | -7.884  | 9.701  | -10.728 | 12.546 |
| III - V    | -2.115   | 0.634   | -10.907 | 6.677  | -13.752 | 9.522  |
| III - VI   | -4.650   | 0.297   | -13.442 | 4.142  | -16.287 | 6.987  |
| IV - V     | -3.024   | 0.497   | -11.816 | 5.769  | -14.661 | 8.613  |
| IV - VI    | -5.559   | 0.213   | -14.351 | 3.234  | -17.196 | 6.078  |
| V - VI     | -2.535   | 0.569   | -11.327 | 6.257  | -14.172 | 9.102  |

The table shows estimates from the repeated measure analysis corrected for sex and age.
